# Supplementary material
Source: Research Square preprint supplement (doi:10.21203/rs.3.rs-9049166/v1)
Supplement: Supplementary file 1 [file c1dc51026443289eb26643e2.docx]

**APPENDIX**

**Table A1: Classification of Sampled Countries by Digitalisation Intensity**

| **Group** | **Countries** | **Empirical Indicators** |
| --- | --- | --- |
| **High-Digitalisation** | Ghana, Kenya, Nigeria, Rwanda, Namibia, Zambia | Internet users >50%; Mobile broadband >80 per 100; EGDI ≈0.45–0.60; GII ICT subindex high; Strong digital policies |
| **Low-Digitalisation** | Burundi, Cameroon, Eritrea, Ethiopia, Gambia, Liberia, Sudan | Internet users <40%; Mobile broadband <60 per 100; EGDI ≈0.30–0.40; GII ICT subindex low; Weak policy infrastructure |

**Note**: *This classification draws on the latest* *(2023–2024) cross-country data from the ITU, World Bank, UNDESA EGDI, GSMA Mobile Connectivity Index, and WIPO Global Innovation Index, harmonised into a conceptual Digitalisation Intensity Index (DII), combining infrastructure, connectivity, e-governance, and innovation capacity dimensions.*

**Table A2: Firm Sectoral Classification by Digital Intensity**

| **Category** | **Sectors Included** | **Core Digital Characteristics** |
| --- | --- | --- |
| **High Tech-Intensive (1)** | Information & Communication Technology (ICT); Finance & Insurance; Manufacturing & Industrial Processing; Transportation & Logistics; Energy & Utilities | High automation, real-time data analytics, ERP, and IoT integration, digital supply-chain linkages |
| **Low Tech-Intensive (0)** | Agriculture & Agribusiness; Retail & Wholesale; Construction; Tourism & Hospitality; Education & Training; Health & Social Services; Community & Cooperative Enterprises; Other Public or Non-profit Services | Limited automation; digital tools primarily support marketing, record-keeping, payments, or customer management |

**Table A3: Measurement model invariance testing using permutation (MICOM approach)**

| **Construct** | **Configural invariance** | **Compositional Invariance Assessment** | | | **Full Measurement Model**  **Invariance Assessment** | | | | |
| --- | --- | --- | --- | --- | --- | --- | --- | --- | --- |
| **Original Correlation** | **0.05 (5.0%)** | **Partial**  **Measurement**  **Invariance**  **Established** | **Equality of Means** | | **Equality of Variances** | | **Full Measurement**  **Invariance**  **Established** |
| **Differences** | **CIs** | **Differences** | **CIs** |
| ***Digitalisation*** | | | | | | | | | |
| DM | Established | 1.000 | 1.000 | Yes | -0.017 | [-0.038; 0.039] | -0.033 | [-0.057; 0.060] | Yes |
| IP | Established | 1.000 | 1.000 | Yes | -0.020 | [-0.041; 0.040] | 0.021 | [-0.060; 0.063] | Yes |
| IRB | Established | 1.000 | 1.000 | Yes | -0.028 | [-0.040; 0.038] | -0.019 | [-0.054; 0.060] | Yes |
| KMC | Established | 1.000 | 1.000 | Yes | -0.010 | [-0.041; 0.042] | 0.016 | [-0.057; 0.058] | Yes |
| OA | Established | 1.000 | 1.000 | Yes | -0.022 | [-0.040; 0.041] | 0.030 | [-0.064; 0.063] | Yes |
| OE | Established | 1.000 | 1.000 | Yes | -0.010 | [-0.040; 0.040] | -0.001 | [-0.057; 0.063] | Yes |
| OIC | Established | 1.000 | 1.000 | Yes | -0.026 | [-0.041; 0.042] | -0.037 | [-0.057; 0.061] | Yes |
| OR | Established | 1.000 | 1.000 | Yes | -0.018 | [-0.041; 0.039] | -0.005 | [-0.058; 0.058] | Yes |
| PU | Established | 1.000 | 1.000 | Yes | -0.020 | [-0.040; 0.040] | -0.024 | [-0.058; 0.062] | Yes |
| SA | Established | 1.000 | 1.000 | Yes | -0.017 | [-0.044; 0.041] | 0.006 | [-0.061; 0.060] | Yes |
| TMS | Established | 1.000 | 1.000 | Yes | -0.010 | [-0.044; 0.040] | 0.005 | [-0.058; 0.060] | Yes |
| ***Tech-Intensity*** | | | | | | | | | |
| DM | Established | 1.000 | 1.000 | Yes | 0.006 | [-0.038; 0.042] | 0.032 | [-0.060; 0.059] | Yes |
| IP | Established | 1.000 | 1.000 | Yes | 0.003 | [-0.039; 0.041] | 0.037 | [-0.059; 0.056] | Yes |
| IRB | Established | 1.000 | 1.000 | Yes | 0.020 | [-0.038; 0.041] | -0.028 | [-0.060; 0.058] | Yes |
| KMC | Established | 1.000 | 1.000 | Yes | -0.023 | [-0.041; 0.038] | 0.048 | [-0.058; 0.057] | Yes |
| OA | Established | 1.000 | 1.000 | Yes | -0.006 | [-0.040; 0.036] | -0.009 | [-0.067; 0.060] | Yes |
| OE | Established | 1.000 | 1.000 | Yes | 0.021 | [-0.038; 0.041] | -0.002 | [-0.060; 0.054] | Yes |
| OIC | Established | 1.000 | 1.000 | Yes | 0.007 | [-0.041; 0.038] | -0.007 | [-0.061; 0.058] | Yes |
| OR | Established | 1.000 | 1.000 | Yes | 0.005 | [-0.043; 0.039] | 0.016 | [-0.056; 0.055] | Yes |
| PU | Established | 1.000 | 1.000 | Yes | -0.017 | [-0.043; 0.042] | 0.021 | [-0.062; 0.059] | Yes |
| SA | Established | 1.000 | 1.000 | Yes | -0.004 | [-0.040; 0.037] | -0.016 | [-0.064; 0.056] | Yes |
| TMS | Established | 1.000 | 1.000 | Yes | 0.023 | [-0.041; 0.039] | -0.053 | [-0.058; 0.060] | Yes |

**Table A4: Hypotheses testing results - high vs low digitalised countries**

| **Paths (Hypotheses)** | ***High digitalised countries*** | | | | | ***Low digitalised countries*** | | | | | **Path Differences** | ***p*-value** |
| --- | --- | --- | --- | --- | --- | --- | --- | --- | --- | --- | --- | --- |
| ***β*** | ***SE*** | ***t-value*** | ***p-value*** | ***f2*** | ***β*** | ***SE*** | ***t-value*** | ***p-value*** | ***f*2** |
| ***Direct Effects (H1-H6)*** | | | | | | | | | | | | |
| H1: DM→OE | 0.109 | 0.013 | 8.473 | 0.000 | 0.012 | 0.158 | 0.016 | 10.005 | 0.000 | 0.025 | -0.049 | 0.015 |
| H2: IRB→OE | 0.155 | 0.013 | 11.815 | 0.000 | 0.024 | 0.141 | 0.016 | 8.847 | 0.000 | 0.021 | 0.014 | 0.507 |
| H3: IRB→DM | 0.185 | 0.013 | 14.748 | 0.000 | 0.035 | 0.146 | 0.016 | 9.347 | 0.000 | 0.022 | 0.039 | 0.053 |
| H4: OR→DM | 0.141 | 0.013 | 10.899 | 0.000 | 0.021 | 0.183 | 0.015 | 12.276 | 0.000 | 0.036 | -0.041 | 0.038 |
| H5: PU→DM | 0.144 | 0.013 | 11.042 | 0.000 | 0.021 | 0.135 | 0.015 | 8.781 | 0.000 | 0.019 | 0.009 | 0.675 |
| H6: IP→DM | 0.177 | 0.013 | 13.755 | 0.000 | 0.032 | 0.165 | 0.015 | 11.058 | 0.000 | 0.028 | 0.011 | 0.565 |
| ***Mediating Effects (H7-H9)*** | | | | | | | | | | | | |
| H7: DM→OIC→OE | 0.069 | 0.006 | 11.653 | 0.000 | *n/a* | 0.073 | 0.008 | 9.688 | 0.000 | *n/a* | -0.004 | 0.681 |
| H8: DM→KMC→OE | 0.062 | 0.006 | 11.090 | 0.000 | *n/a* | 0.053 | 0.007 | 7.464 | 0.000 | *n/a* | 0.010 | 0.271 |
| H9: DM→SA→OE | 0.052 | 0.006 | 9.347 | 0.000 | *n/a* | 0.046 | 0.007 | 7.015 | 0.000 | *n/a* | 0.006 | 0.496 |
| ***Moderating Effects (H10 - H13)*** | | | | | | | | | | | | |
| H10: IRB×DM→OE | -0.003 | 0.011 | 0.317 | 0.751 | 0.000 | 0.008 | 0.013 | 0.576 | 0.565 | 0.000 | -0.011 | 0.520 |
| H11: OA×DM→OE | 0.029 | 0.011 | 2.683 | 0.007 | 0.001 | 0.010 | 0.012 | 0.809 | 0.418 | 0.000 | 0.019 | 0.255 |
| H12: TMS×IRB→DM | 0.003 | 0.011 | 0.298 | 0.765 | 0.000 | 0.011 | 0.014 | 0.751 | 0.453 | 0.000 | -0.007 | 0.684 |
| H13: IP×IRB → DM | 0.021 | 0.011 | 1.892 | 0.059 | 0.001 | 0.018 | 0.013 | 1.329 | 0.184 | 0.000 | 0.003 | 0.849 |
| ***Control Variables*** | | | | | | | | | | | | |
| Firm age←DM | 0.008 | 0.010 | 0.804 | 0.421 | *n/a* | 0.000 | 0.013 | 0.001 | 0.999 | *n/a* | *n/a* | *n/a* |
| Firm age←KMC | -0.009 | 0.011 | 0.771 | 0.441 | *n/a* | 0.001 | 0.015 | 0.042 | 0.967 | *n/a* | *n/a* | *n/a* |
| Firm age←OE | -0.006 | 0.010 | 0.596 | 0.551 | *n/a* | -0.004 | 0.013 | 0.270 | 0.787 | *n/a* | *n/a* | *n/a* |
| Firm age←OIC | 0.001 | 0.012 | 0.073 | 0.942 | *n/a* | 0.011 | 0.014 | 0.764 | 0.445 | *n/a* | *n/a* | *n/a* |
| Firm age←SA | -0.014 | 0.012 | 1.227 | 0.220 | *n/a* | 0.007 | 0.014 | 0.521 | 0.602 | *n/a* | *n/a* | *n/a* |
| Firm size←DM | -0.005 | 0.011 | 0.433 | 0.665 | *n/a* | -0.007 | 0.013 | 0.540 | 0.589 | *n/a* | *n/a* | *n/a* |
| Firm size←KMC | -0.001 | 0.012 | 0.062 | 0.950 | *n/a* | 0.030 | 0.015 | 2.044 | 0.041 | *n/a* | *n/a* | *n/a* |
| Firm size←OE | -0.010 | 0.011 | 0.951 | 0.342 | *n/a* | 0.023 | 0.013 | 1.731 | 0.083 | *n/a* | *n/a* | *n/a* |
| Firm size←OIC | -0.004 | 0.012 | 0.303 | 0.762 | *n/a* | 0.005 | 0.015 | 0.319 | 0.750 | *n/a* | *n/a* | *n/a* |
| Firm size←SA | -0.002 | 0.012 | 0.165 | 0.869 | *n/a* | 0.012 | 0.014 | 0.838 | 0.402 | *n/a* | *n/a* | *n/a* |
| Industry←DM | 0.010 | 0.010 | 0.919 | 0.358 | *n/a* | -0.014 | 0.013 | 1.086 | 0.277 | *n/a* | *n/a* | *n/a* |
| Industry←KMC | -0.002 | 0.012 | 0.202 | 0.840 | *n/a* | 0.006 | 0.014 | 0.390 | 0.697 | *n/a* | *n/a* | *n/a* |
| Industry←OE | -0.004 | 0.010 | 0.359 | 0.719 | *n/a* | -0.030 | 0.013 | 2.265 | 0.024 | *n/a* | *n/a* | *n/a* |
| Industry←OIC | -0.016 | 0.011 | 1.396 | 0.163 | *n/a* | 0.027 | 0.014 | 1.944 | 0.052 | *n/a* | *n/a* | *n/a* |
| Industry←SA | 0.007 | 0.012 | 0.608 | 0.543 | *n/a* | 0.013 | 0.015 | 0.906 | 0.365 | *n/a* | *n/a* | *n/a* |

**Table A5: Hypotheses testing results - high vs low tech intensity**

| **Paths (Hypotheses)** | ***High Tech-Intensity*** | | | | | ***Low Tech-Intensity*** | | | | | **Path Differences** | ***p*-value** |
| --- | --- | --- | --- | --- | --- | --- | --- | --- | --- | --- | --- | --- |
| ***β*** | ***SE*** | ***t-value*** | ***p-value*** | ***f2*** | ***β*** | ***SE*** | ***t-value*** | ***p-value*** | ***f2*** |
| ***Direct Effects (H1-H6)*** | | | | | | | | | | | | |
| H1: DM→OE | 0.138 | 0.015 | 9.334 | 0.000 | 0.019 | 0.122 | 0.013 | 9.456 | 0.000 | 0.015 | 0.015 | 0.431 |
| H2: IRB→OE | 0.127 | 0.015 | 8.378 | 0.000 | 0.017 | 0.166 | 0.013 | 12.474 | 0.000 | 0.028 | -0.039 | 0.051 |
| H3: IRB→DM | 0.183 | 0.015 | 12.020 | 0.000 | 0.036 | 0.159 | 0.013 | 12.271 | 0.000 | 0.026 | 0.025 | 0.219 |
| H4: OR→DM | 0.156 | 0.015 | 10.499 | 0.000 | 0.026 | 0.160 | 0.013 | 12.390 | 0.000 | 0.027 | -0.004 | 0.833 |
| H5: PU→DM | 0.136 | 0.015 | 9.001 | 0.000 | 0.019 | 0.143 | 0.013 | 11.012 | 0.000 | 0.021 | -0.007 | 0.729 |
| H6: IP→DM | 0.165 | 0.015 | 11.280 | 0.000 | 0.028 | 0.178 | 0.013 | 13.643 | 0.000 | 0.033 | -0.013 | 0.523 |
| ***Mediating Effects (H7-H9)*** | | | | | | | | | | | | |
| H7: DM→OIC→OE | 0.079 | 0.007 | 11.356 | 0.000 | *n/a* | 0.065 | 0.006 | 10.296 | 0.000 | *n/a* | 0.014 | 0.150 |
| H8: DM→KMC→OE | 0.057 | 0.007 | 8.404 | 0.000 | *n/a* | 0.059 | 0.006 | 10.270 | 0.000 | *n/a* | -0.002 | 0.827 |
| H9: DM→SA→OE | 0.047 | 0.007 | 7.263 | 0.000 | *n/a* | 0.051 | 0.006 | 9.007 | 0.000 | *n/a* | -0.004 | 0.635 |
| ***Moderating Effects (H10 - H13)*** | | | | | | | | | | | | |
| H10: IRB×DM→OE | -0.013 | 0.013 | 1.023 | 0.306 | 0.000 | 0.012 | 0.011 | 1.050 | 0.294 | 0.000 | -0.025 | 0.142 |
| H11: OA×DM→OE | 0.025 | 0.013 | 1.952 | 0.051 | 0.001 | 0.018 | 0.011 | 1.688 | 0.091 | 0.000 | 0.007 | 0.676 |
| H12: TMS×IRB→DM | 0.023 | 0.014 | 1.624 | 0.104 | 0.001 | -0.004 | 0.012 | 0.357 | 0.721 | 0.000 | 0.027 | 0.141 |
| H13: IP×IRB→DM | 0.010 | 0.013 | 0.751 | 0.453 | 0.000 | 0.026 | 0.011 | 2.276 | 0.023 | 0.001 | -0.016 | 0.347 |
| ***Control Variables*** | | | | | | | | | | | | |
| Firm age← DM | 0.006 | 0.013 | 0.510 | 0.610 | *n/a* | 0.005 | 0.011 | 0.454 | 0.650 | *n/a* | *n/a* | *n/a* |
| Firm age← KMC | -0.006 | 0.014 | 0.452 | 0.651 | *n/a* | -0.005 | 0.012 | 0.418 | 0.676 | *n/a* | *n/a* | *n/a* |
| Firm age←OE | -0.003 | 0.013 | 0.248 | 0.804 | *n/a* | -0.008 | 0.011 | 0.767 | 0.443 | *n/a* | *n/a* | *n/a* |
| Firm age←OIC | 0.001 | 0.014 | 0.050 | 0.960 | *n/a* | 0.008 | 0.012 | 0.655 | 0.513 | *n/a* | *n/a* | *n/a* |
| Firm age←SA | -0.029 | 0.014 | 2.093 | 0.036 | *n/a* | 0.011 | 0.012 | 0.954 | 0.340 | *n/a* | *n/a* | *n/a* |
| Firm size←DM | -0.008 | 0.013 | 0.663 | 0.507 | *n/a* | -0.003 | 0.011 | 0.277 | 0.782 | *n/a* | *n/a* | *n/a* |
| Firm size←KMC | 0.011 | 0.014 | 0.805 | 0.421 | *n/a* | 0.011 | 0.012 | 0.916 | 0.360 | *n/a* | *n/a* | *n/a* |
| Firm size←OE | -0.003 | 0.013 | 0.261 | 0.794 | *n/a* | 0.008 | 0.011 | 0.749 | 0.454 | *n/a* | *n/a* | *n/a* |
| Firm size←OIC | -0.004 | 0.014 | 0.271 | 0.786 | *n/a* | 0.002 | 0.012 | 0.204 | 0.839 | *n/a* | *n/a* | *n/a* |
| Firm size←SA | 0.021 | 0.014 | 1.519 | 0.129 | *n/a* | -0.010 | 0.012 | 0.835 | 0.404 | *n/a* | *n/a* | *n/a* |
| Industry←DM | 0.000 | 0.012 | 0.013 | 0.990 | *n/a* | 0.000 | 0.011 | 0.020 | 0.984 | *n/a* | *n/a* | *n/a* |
| Industry←KMC | 0.008 | 0.014 | 0.548 | 0.584 | *n/a* | -0.007 | 0.012 | 0.562 | 0.574 | *n/a* | *n/a* | *n/a* |
| Industry←OE | -0.016 | 0.012 | 1.321 | 0.187 | *n/a* | -0.010 | 0.011 | 0.896 | 0.370 | *n/a* | *n/a* | *n/a* |
| Industry←OIC | 0.003 | 0.014 | 0.220 | 0.826 | *n/a* | 0.001 | 0.012 | 0.061 | 0.952 | *n/a* | *n/a* | *n/a* |
| Industry←SA | 0.024 | 0.014 | 1.688 | 0.091 | *n/a* | 0.000 | 0.012 | 0.035 | 0.972 | *n/a* | *n/a* | *n/a* |

| ***High Digitalised Countries***  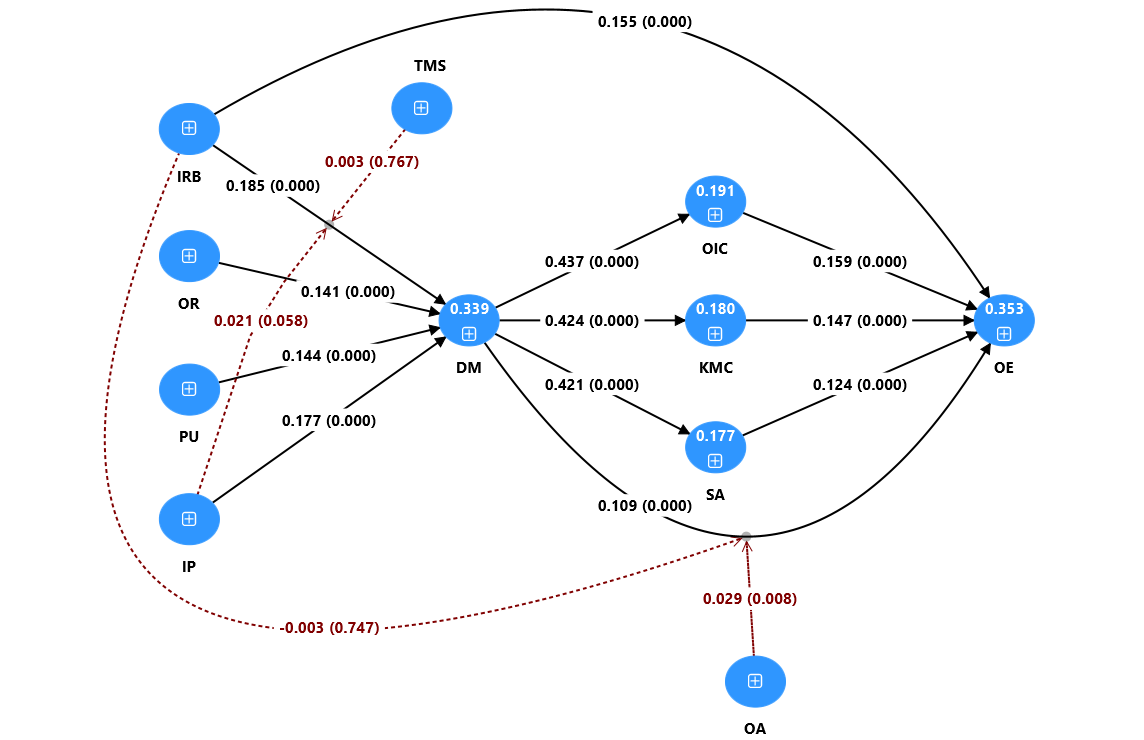 | ***Low Digitalised Countries***  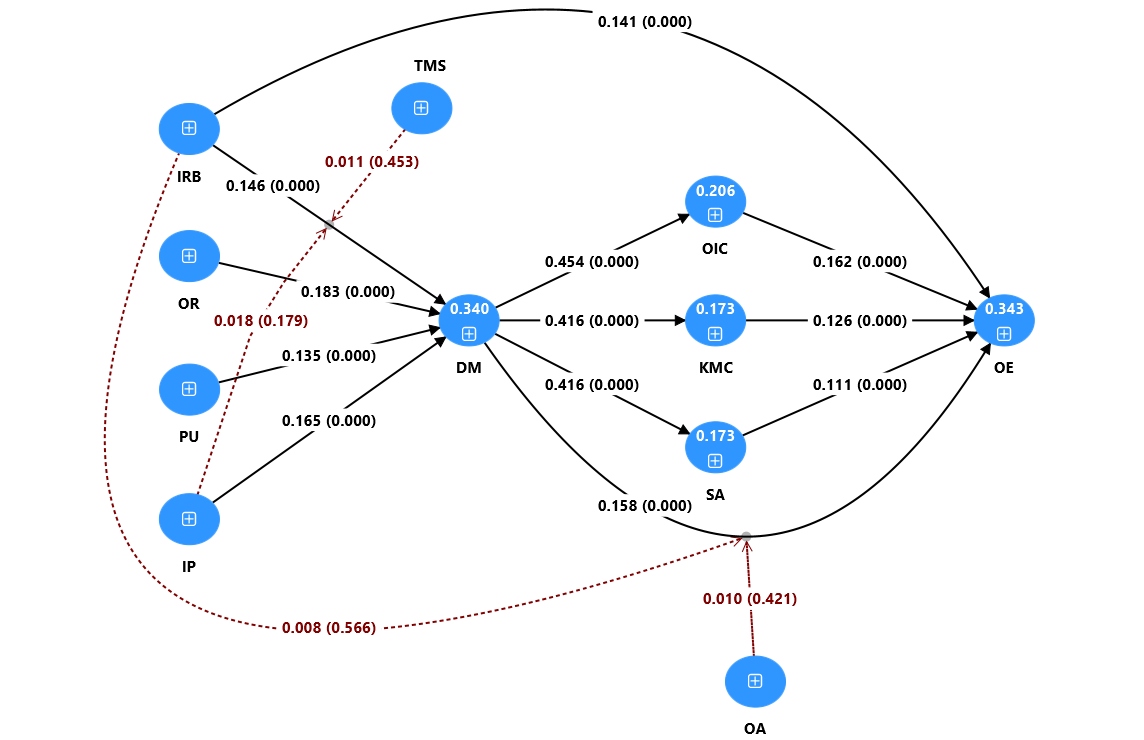 |
| --- | --- |

**Figure A1: Structural model results for high vs low digitalised countries**

| ***High Tech-Intensity***  ***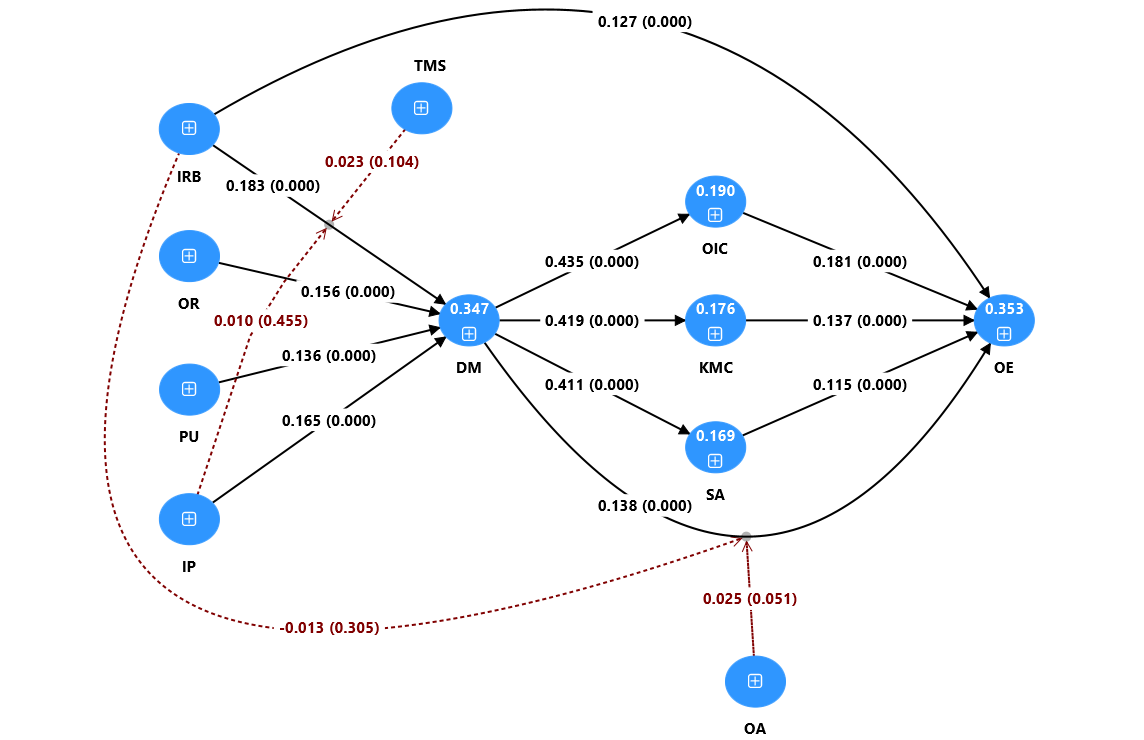*** | ***Low Tech-Intensity***  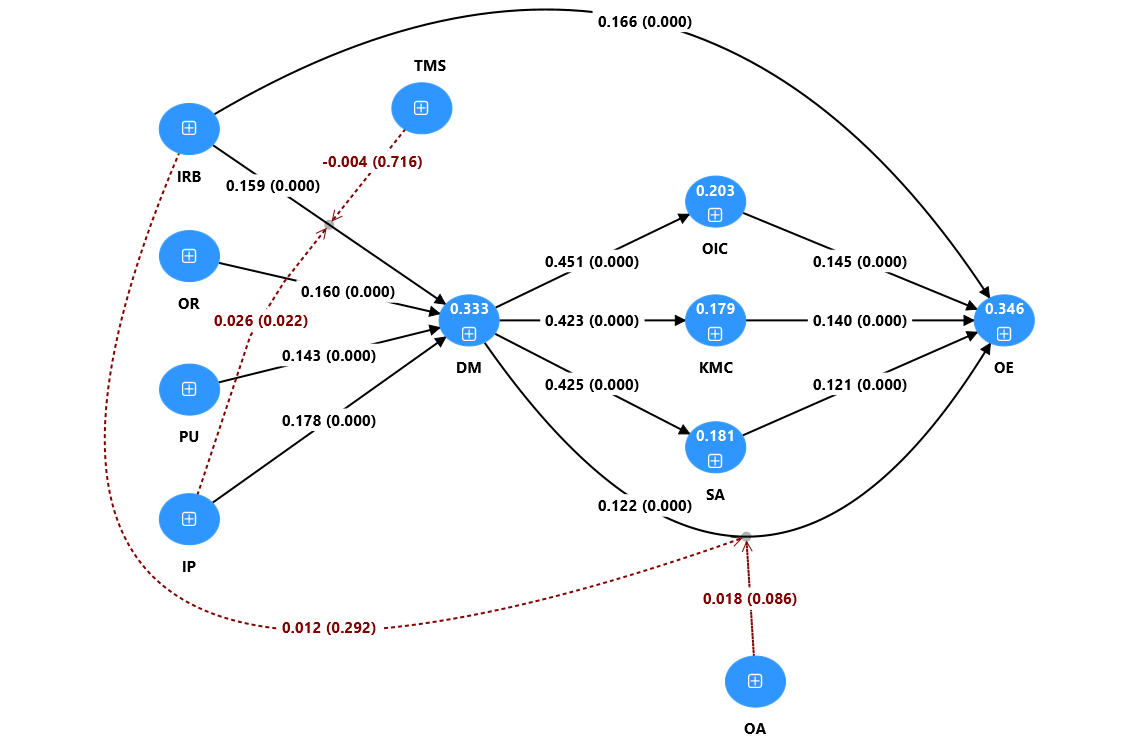 |
| --- | --- |

**Figure A2: Structural model results for high vs low-tech intensity**
